# Supplementary material for: A Comparison Between Single- and Multi-Scale Approaches for Classification of Histopathology Images
Source: PubMed Central journal article supplement (PMC9289164; doi:10.3389/fpubh.2022.892658), 2022-07-04
Supplement: Table_1.pdf [file Table_1.pdf]

## *Supplementary Material*

### **1 Supplementary Tables**

Supplementary Table 1. Cancer types with their corresponding acronyms.

| Id | Acronym | Cancer type                                                      |
|----|---------|------------------------------------------------------------------|
| 0  | ACC     | Adrenocortical carcinoma                                         |
| 1  | BLCA    | Bladder Urothelial Carcinoma                                     |
| 2  | BRCA    | Breast invasive carcinoma                                        |
| 3  | CESC    | Cervical squamous cell carcinoma and endocervical adenocarcinoma |
| 4  | CHOL    | Cholangiocarcinoma                                               |
| 5  | COAD    | Colon adenocarcinoma                                             |
| 6  | DLBC    | Lymphoid Neoplasm Diffuse Large B-cell Lymphoma                  |
| 7  | ESCA    | Esophageal carcinoma                                             |
| 8  | GBM     | Glioblastoma multiforme                                          |
| 9  | HNSC    | Head and Neck squamous cell carcinoma                            |
| 10 | KICH    | Kidney Chromophobe                                               |
| 11 | KIRC    | Kidney renal clear cell carcinoma                                |
| 12 | KIRP    | Kidney renal papillary cell carcinoma                            |
| 13 | LGG     | Brain Lower Grade Glioma                                         |
| 14 | LIHC    | Liver hepatocellular carcinoma                                   |
| 15 | LUAD    | Lung adenocarcinoma                                              |
| 16 | LUSC    | Lung squamous cell carcinoma                                     |
| 17 | MESO    | Mesothelioma                                                     |

|    |      |                                      |
|----|------|--------------------------------------|
| 18 | OV   | Ovarian serous cystadenocarcinoma    |
| 19 | PAAD | Pancreatic adenocarcinoma            |
| 20 | PCPG | Pheochromocytoma and Paraganglioma   |
| 21 | PRAD | Prostate adenocarcinoma              |
| 22 | SARC | Sarcoma                              |
| 23 | SKCM | Skin Cutaneous Melanoma              |
| 24 | STAD | Stomach adenocarcinoma               |
| 25 | TGCT | Testicular Germ Cell Tumors          |
| 26 | THCA | Thyroid carcinoma                    |
| 27 | THYM | Thymoma                              |
| 28 | UCEC | Uterine Corpus Endometrial Carcinoma |
| 29 | UCS  | Uterine Carcinosarcoma               |

Supplementary Table 2. Overview of the TCGA dataset.

| Acronym | Train+validation sets slides | Test set slides |
|---------|------------------------------|-----------------|
| BRCA    | 842                          | 211             |
| KIRC    | 410                          | 102             |
| THCA    | 405                          | 101             |
| UCEC    | 403                          | 101             |
| LGG     | 390                          | 97              |
| LUSC    | 382                          | 95              |
| LUAD    | 374                          | 93              |
| COAD    | 341                          | 85              |
| PRAD    | 322                          | 81              |
| GBM     | 310                          | 78              |

|      |     |    |
|------|-----|----|
| BLCA | 309 | 77 |
| STAD | 300 | 75 |
| LIHC | 288 | 72 |
| SKCM | 232 | 58 |
| KIRP | 220 | 55 |
| CESC | 214 | 54 |
| SARC | 199 | 50 |
| HNSC | 175 | 44 |
| PAAD | 142 | 36 |
| PCPG | 136 | 34 |
| ESCA | 125 | 31 |
| TGCT | 119 | 30 |
| THYM | 97  | 24 |
| OV   | 85  | 21 |
| KICH | 81  | 20 |
| MESO | 60  | 15 |
| ACC  | 45  | 11 |
| UCS  | 42  | 11 |
| CHOL | 29  | 7  |
| DLBC | 10  | 3  |

Supplementary Table 3. Validation set results for 5 fold Monte Carlo cross-validation with 95% confidence interval for barcode approach.

|             | Full Dataset         |                      |                      |                      |                      | Subsampled Dataset   |                      |                      |                      |                      |
|-------------|----------------------|----------------------|----------------------|----------------------|----------------------|----------------------|----------------------|----------------------|----------------------|----------------------|
|             | 5x                   | 10x                  | 20x                  | 5x + 10x             | 5x + 10x + 20x       | 5x                   | 10x                  | 20x                  | 5x + 10x             | 5x + 10x + 20x       |
| Weighted F1 | 0.79<br>(0.76, 0.81) | 0.70<br>(0.68, 0.73) | 0.74<br>(0.71, 0.77) | 0.81<br>(0.79, 0.83) | 0.72<br>(0.69, 0.75) | 0.71<br>(0.67, 0.75) | 0.58<br>(0.56, 0.61) | 0.66<br>(0.62, 0.70) | 0.73<br>(0.70, 0.77) | 0.76<br>(0.73, 0.79) |
| Macro F1    | 0.70<br>(0.68, 0.72) | 0.62<br>(0.59, 0.65) | 0.65<br>(0.62, 0.69) | 0.73<br>(0.71, 0.76) | 0.63<br>(0.59, 0.67) | 0.69<br>(0.65, 0.74) | 0.57<br>(0.53, 0.60) | 0.63<br>(0.58, 0.69) | 0.71<br>(0.67, 0.76) | 0.74<br>(0.70, 0.79) |
